# The Brain Dynamics Toolbox for Matlab

Stewart Heitmann, Matthew Aburn, Michael Breakspear

*QIMR Berghofer Medical Research Institute  
300 Herston Road, Herston QLD 4006, Australia*

---

## Abstract

The Brain Dynamics Toolbox provides a graphical tool for simulating user-defined dynamical systems in MATLAB. It supports three classes of differential equations commonly used in computational neuroscience: Ordinary Differential Equations, Delay Differential Equations and Stochastic Differential Equations. The design of the graphical interface fosters intuitive exploration of the dynamics, yet there is no barrier to scripting large-scale simulations and parameter explorations. System variables and parameters may range in size from simple scalars to large vectors or matrices. The toolbox is intended for dynamical models in computational neuroscience but it can be applied to continuous dynamical systems from any domain.

*Keywords:* initial-value problems, differential equations, numerical integration, visualization, brain dynamics

---

## 1. Introduction

Computational neuroscience relies heavily on numerical methods for simulating non-linear models of brain dynamics. Software toolkits are the manifestation of those endeavors. Each one represents an attempt to balance mathematical flexibility with computational convenience. Toolkits such as GENESIS [1], NEURON [2] and BRIAN [3] provide convenient methods to simulate conductance-based models of single neurons and networks thereof. The Virtual Brain [4] scales up that approach to the macroscopic dynamics of the whole brain. It combines neural field models [5] with anatomical connectivity datasets for the purpose of generating realistic EEG, MEG and fMRI data. Toolkits such as AUTO [6], XPPAUT [7], MATCONT [8], PyDSTool [9] and CoCo [10] provide numerical methods from applied mathematics for

analyzing non-linear dynamical systems. These toolkits are highly applicable to computational neuroscience but assume a substantial background in mathematical theory. Many of the toolkits described above also require substantial computer programming effort from the user.

## 2. Problems and Background

In our experience of publishing and teaching computational neuroscience, the existing toolkits often present technical barriers to a broader audience. The Brain Dynamics Toolbox aims to bridge that gap by allowing those with diverse backgrounds to explore neuronal dynamics through phase space analysis, time series exploration and other methods with minimal programming burden. A custom model can typically be implemented with our toolbox in fewer than 100 lines of standard MATLAB code. Object-oriented programming techniques are not required. Once the model is implemented, it can be loaded into the graphical interface (Figure 1) for interactive simulation or run without the graphical interface using command-line tools. The graphical controls are themselves accessible to the user as workspace variables. This makes it easy to use the MATLAB command window to orchestrate quick parameter surveys within the graphical interface. The command-line tools are useful for scripting larger surveys since they utilize the same toolbox infrastructure but do not invoke the graphical interface. The Brain Dynamics Toolbox thus provides intuitive access to neurodynamical modeling tools while retaining the ability to automate large-scale simulations.

## 3. Software Framework

The toolbox operates on user-defined systems of Ordinary Differential Equations (ODEs), Delay Differential Equations (DDEs) and Stochastic Differential Equations (SDEs). The details differ slightly for each type but the overall approach is the same. The right-hand side of the dynamical system,

$$\frac{dY}{dt} = F(t, Y),$$

is implemented as a matlab function of the form  $\text{dYdt} = F(t, Y)$ . The toolbox takes a handle to that function and passes it to the relevant solver routine on the user's behalf. The solver repeatedly calls  $F(t, Y)$  in the process of computing the evolution of  $Y(t)$  from a given set of initial conditions. The

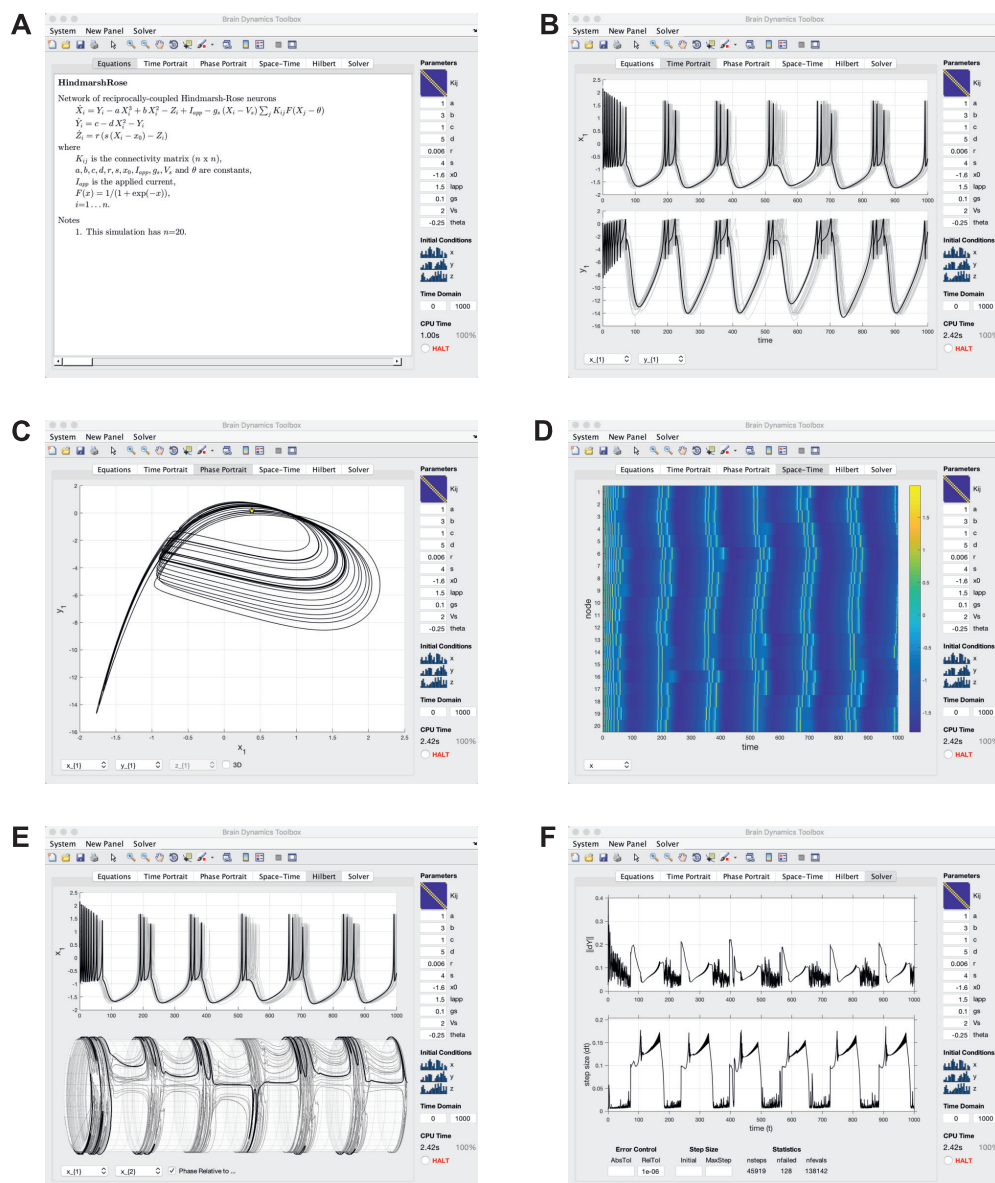

Figure 1: Screenshots of selected display panels in the graphical interface as it simulates a network of  $n=20$  Hindmarsh-Rose [11] neurons. Display panels can be added or removed at run-time. The parameters of the model are manipulated with the control panel on the right-hand side of the application window. Individual controls can represent scalar, vector or matrix values. **A** The mathematical equations panel. **B** Time portraits. **C** Phase portrait. **D** Space-time portrait. **E** Hilbert transform. **F** Solver step sizes.

44 toolbox uses the same approach as the standard MATLAB solvers (e.g. `ode45`,  
 45 `dde23`) except that it also manages the input parameters and plots the solver  
 46 output. To do so, it requires the names and values of the system parameters  
 47 and state variables. Those details (and more) are passed to the toolbox  
 48 via a special data structure that we call a *system structure*. It encapsulates  
 49 everything needed to simulate a user-defined model. Once a system structure  
 50 has been constructed, it can be shared with other toolbox users.

### 51 3.1. Software Architecture and Functionality

52 The architecture is modular so that solver routines and visualization tools  
 53 can be applied to any model in any combination (Figure 2). The combinato-  
 54 rial power of this approach brings great efficiency to the exploration of new  
 55 models, as well as fostering the long-term evolution of the toolbox itself. The  
 56 list of numerical solver routines and graphical panels that the toolbox sup-  
 57 ports continues to grow rapidly. As of this writing, it includes the standard  
 58 ODE solvers (`ode45`, `ode23`, `ode113`, `ode15s`, `ode23s`) and DDE solver  
 59 (`dde23`) that are shipped with MATLAB. As well as a fixed-step ODE solver  
 60 (`odeEul`) and two SDE solvers (`sdeEM`, `sdeSH`) that are specific to the Brain  
 61 Dynamics Toolbox. The two SDE solvers are specialized for stochastic equa-  
 62 tions that use Itô calculus and Stratonovich calculus respectively. Custom  
 63 solvers can also be added provided that they adhere to toolbox conventions.

64 The display panels include time plots, phase portraits, space-time plots,  
 65 linear correlations, Hilbert transforms, surrogate data transforms, solver  
 66 statistics and mathematical equations rendered with LaTeX. New panels are  
 67 being added on a regular basis and we encourage users to write custom panels  
 68 for their own projects. Display panels not only visualize the solver output  
 69 but can be used to apply transformations or custom metrics to it. The panel  
 70 outputs themselves are accessible to the user as workspace variables where  
 71 they can be readily saved for further analysis or publication.

## 72 4. Illustrative Example

We demonstrate the implementation of a network of recurrently-connected  
 Hindmarsh-Rose [11] neurons,

$$\dot{X}_i = Y_i - a X_i^3 + b X_i^2 - Z_i + I_i - J_i, \quad (1)$$

$$\dot{Y}_i = c - d X_i^2 - Y_i, \quad (2)$$

$$\dot{Z}_i = r (s (X_i - x_0) - Z_i), \quad (3)$$

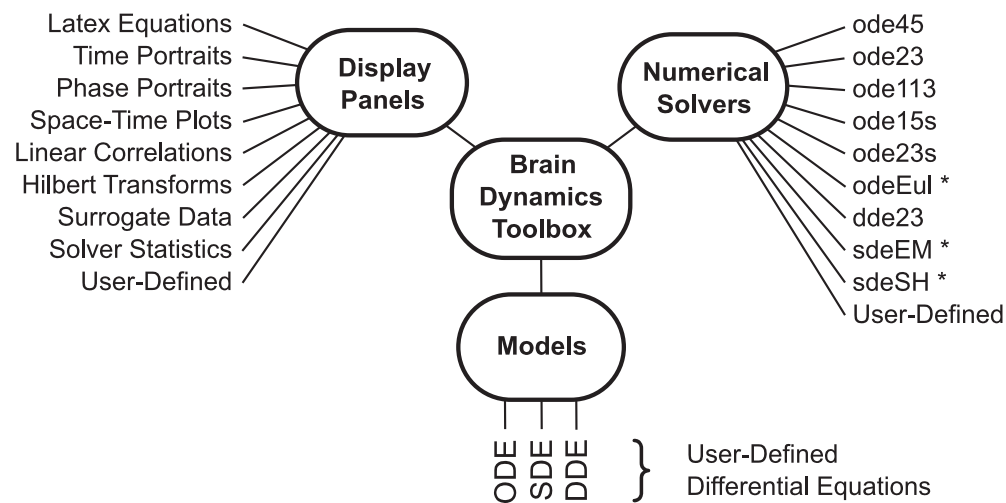

Figure 2: Software architecture of the Brain Dynamics Toolbox. Display panels, numerical solver routines and user-defined models are all implemented separately as inter-changeable modules. New models can thus be explored quickly with existing tools. Custom tools can also be defined for specialized investigations. Numerical solvers marked with an asterisk are unique to the toolbox.

73 where  $X_i$  is the membrane potential of the  $i^{th}$  neuron,  $Y_i$  is the conductance  
74 of that neuron's excitatory ion channels, and  $Z_i$  is the conductance of its  
75 inhibitory ion channels. Each neuron in the network is driven by a locally ap-  
76 plied current  $I_i$  and a network current  $J_i = g_s (X_i - V_s) \sum_j K_{ij} F(X_j - \theta)$  that  
77 represents the synaptic bombardment from other neurons. The sigmoidal  
78 function  $F(x) = 1/(1 + \exp(-x))$  transforms that synaptic bombardment to  
79 an equivalent ionic current. The connectivity matrix  $K_{ij}$  defines the weight-  
80 ings of the synaptic connections between neurons. All other parameters in  
81 the model are scalar constants although their meaning is unimportant here.  
82 Suffice to say that this model represents a typical example of using coupled  
83 ODEs to model a neuronal network.

#### 84 4.1. Defining the model

85 Listing 1 shows the code required to implement equations (1-3) with the  
86 toolbox. It consists of three functions: The main function, `HindmarshRose`,  
87 constructs the model's system structure (`sys`) for a given connectivity ma-  
88 trix, `Kij`. The `odefun` function defines the right-hand side of the differential  
89 equations (1-3). All but the first two input parameters of that function cor-  
90 respond to the ODE parameters (i.e. `Kij`, `a`, `b`, ...) as defined in the system  
91 structure (lines 8-20). The third function (lines 65-68) defines the sigmoid  
92 function used by this particularly model. It has no special significance to the  
93 toolbox.

Listing 1: Implementation of a network of Hindmarsh-Rose neurons (equations 1-3). The `HindmarshRose(Kij)` function takes a connectivity matrix `Kij` as input and returns a corresponding system structure for the model. The number of neurons (equations) in the model is determined from the size of `Kij` which is fixed for the life of the system structure.

```

941 function sys = HindmarshRose(Kij)
952     % determine the number of nodes from Kij
963     n = size(Kij,1);
974
985     % Handle to our ODE function
996     sys.odefun = @odefun;
1007
1018     % Our ODE parameters
1029     sys.pardef = [ struct('name','Kij',    'value',Kij);
1030                   struct('name','a',      'value',1);
1041                   struct('name','b',      'value',3);
1052                   struct('name','c',      'value',1);
1063                   struct('name','d',      'value',5);
1074                   struct('name','r',      'value',0.006);
```

```

1085         struct('name','s', 'value',4);
1096         struct('name','x0', 'value',-1.6);
1107         struct('name','Iapp', 'value',1.5);
1118         struct('name','gs', 'value',0.1);
1129         struct('name','Vs', 'value',2);
1130         struct('name','theta', 'value',-0.25) ];
1141
1152 % Our ODE variables
1163 sys.vardef = [ struct('name','x', 'value',rand(n,1));
1174               struct('name','y', 'value',rand(n,1));
1185               struct('name','z', 'value',rand(n,1)) ];
1196
1207
1218 % Latex (Equations) panel
1229 sys.panels.bdLatexPanel.title = 'Equations';
1230 sys.panels.bdLatexPanel.latex = {
1241     '\textbf{HindmarshRose}';
1252     '';
1263     'Network of coupled Hindmarsh-Rose neurons';
1274     '\quad $\dot{X}_i = Y_i - a\,X_i^3 + b\,X_i^2 - Z_i +$
128     $I_{app} - g_s\,(X_i - V_s) \sum_j K_{ij} F(X_j - \theta)$';
1295     '\quad $\dot{Y}_i = c - d\,X_i^2 - Y_i$';
1306     '\quad $\dot{Z}_i = r\,(s\,(X_i - x_0) - Z_i)$';
1317     'where';
1328     '\quad $K_{ij}$ is the connectivity matrix,';
1339     '\quad $a, b, c, d, r, s, x_0, I_{app}, g_s, V_s$
134     and $\theta$ are constants,';
1350     '\quad $I_{app}$ is the applied current,';
1361     '\quad $F(x) = 1/(1+\exp(-x))$,';
1372     '\quad $i=1 \dots n$.' };
1383 end
1394
1405 % The ODE function for the Hindmarsh Rose model.
1416 function dY = odefun(t,Y,Kij,a,b,c,d,r,s,x0,I,gs,Vs,theta)
1427 % extract incoming variables from Y
1438 Y = reshape(Y,[],3); % reshape Y to (nx3)
1449 x = Y(:,1); % x is (nx1) vector
1450 y = Y(:,2); % y is (nx1) vector
1461 z = Y(:,3); % z is (nx1) vector
1472
1483 % The network coupling term
1494 Inet = gs*(x-Vs) .* (Kij*F(x-theta));
1505
1516 % Hindmarsh-Rose equations
1527 dx = y - a*x.^3 + b*x.^2 - z + I - Inet;

```

```

153:8     dy = c - d*x.^2 - y;
154:9     dz = r*(s*(x-x0)-z);
155:0
156:1     % return result (3n x 1)
157:2     dY = [dx; dy; dz];
158:3 end
159:4
160:5 % Sigmoid function
161:6 function y=F(x)
162:7     y = 1./(1+exp(-x));
163:8 end

```

164 The bulk of the code is dedicated to constructing the system structure  
165 (lines 1–43) which is described in detail in the *Handbook for the Brain Dy-*  
166 *namics Toolbox* [12]. Among other things, the system structure requires  
167 a handle to the ODE function (line 6) as well as the names and values of  
168 the ODE parameters (lines 8–20) and the ODE variables (lines 22–25). It  
169 also defines the latex strings for rendering the mathematical equations in the  
170 display panel (lines 28–42). Those LaTeX strings are important for docu-  
171 menting the model but they play no part in the simulation itself. It is not  
172 unusual for LaTeX strings to be larger than the differential equations they  
173 describe.

#### 174 4.2. Running the model.

175 The model is run by constructing an instance of its system structure and  
176 loading that into the toolbox graphical user interface, which is called `bdGUI`.

```

177 >> n = 20; % Define number of neurons.
178 >> Kij = circshift(eye(n),1) ... % Define connection matrix,
179         + circshift(eye(n),-1); % as a chain in this case.
180 >> sys = HindmarshRose(Kij); % Construct the sys struct.
181 >> bdGUI(sys); % Run the model in the GUI.

```

182 The graphical user interface (Figure 1) automatically recomputes the solution  
183 whenever any of the controls are adjusted. That includes the parameters of  
184 the model, the initial conditions of the state variables, the time domain of the  
185 simulation and the solver options. The computed solution can be visualized  
186 with any number of display panels, all of which are updated concurrently.  
187 The display panels in Figure 1 are from this very model.



### 188 4.3. Controlling the model

189 The `bdGUI` application returns a handle to itself which can be used to  
190 control the simulation from the MATLAB command window.

```
191 >> gui = bdGUI(sys)
192 gui =
193     bdGUI with properties:
194         version: '2017c'           % toolbox version string
195         fig: [1x1 Figure]         % application figure handle
196         par: [1x1 struct]         % system parameters (read-write)
197         var0: [1x1 struct]        % initial conditions (read-write)
198         var: [1x1 struct]         % solution variables (read-only)
199         t: [1x9522 double]        % solution time points (read-only)
200         lag: []                   % DDE lag parameters (read-write)
201         sys: [1x1 struct]         % system structure (read-only)
202         sol: [1x1 struct]         % solver output (read-only)
203         sox: []                   % auxiliary variables (read-only)
204         panels: [1x1 struct]      % display panel outputs (read-only)
```

205 The parameters of the model are accessible by name via the `gui.par` struc-  
206 ture. Likewise, the computed solution variables are accessible by name via  
207 the `gui.var` structure. The output of the solver is also accessible in its native  
208 format via the `gui.sol` structure. The parameters and the initial conditions  
209 are read-write properties whereas the computed solutions are read-only. Any  
210 value written into the `gui` handle is immediately applied to the graphical user  
211 interface, and vice versa. Thus it is possible to use workspace commands to  
212 orchestrate parameter sweeps in the graphical user interface. For example,

```
213 >> for r=linspace(0.05,0.001,25); gui.par.r=r; end;
```

214 sweeps the  $r$  parameter (time constant of inhibition) from 0.05 to 0.001 in  
215 25 increments. The computed solution is updated at each increment and a  
216 bursting phenomenon is observed for  $r \lesssim 0.01$ .

### 217 4.4. Scripting the model

218 The toolbox provides a small suite of command-line tools for running  
219 models without invoking the graphical interface. Of these, the most notable  
220 commands are `bdSolve(sys,tspan)` — which runs the solver on a given  
221 model for a given time span — and `bdEval(sol,t)` which interpolates the  
222 solution for a given set of time points.

```

223 >> t = 0:1000;
224 >> sol = bdSolve(sys,[t(1) t(end)]);
225 >> X = bdEval(sol,t);
226 >> plot(t,X);

```

227 The `bdEval` function is equivalent to the MATLAB `deval` function except that  
228 it also works for solution structures (`sol`) returned by third-party solvers. See  
229 the *Handbook for the Brain Dynamics Toolbox* [12] for a complete description  
230 of the command-line tools.

## 231 5. Conclusions

232 The Brain Dynamics Toolbox provides researchers with an interactive  
233 graphical tool for exploring user-defined dynamical systems without the bur-  
234 den of programming bespoke graphical applications. The graphical interface  
235 imposes no limit the size of the model nor the number of parameters involved.  
236 System parameters and variables can range in size from simple scalar values  
237 to large-scale vectors or matrices without loss of generality. The design also  
238 imposes no barrier to scripting large-scale simulations and parameter surveys.  
239 The toolbox is aimed at students, engineers and researchers in computational  
240 neuroscience but it can also be applied to general problems in dynamical  
241 systems. Once a model is implemented, it can be readily shared with other  
242 toolbox users. The toolbox thus serves as a hub for sharing models as much  
243 as it serves as a tool for simulating them. Indeed, we anticipate the number  
244 of available models and plotting tools to continue to grow as the user base  
245 expands.

## 246 Acknowledgements

247 MATLAB® is a registered trademark of The Mathworks, Inc., 3 Apple  
248 Hill Drive, Natick, MA 01760-2098 USA, 508-647-7000, Fax 508-647-7001,  
249 *info@mathworks.com*, *www.mathworks.com*

- 250 [1] J. M. Bower, D. Beeman, The book of Genesis: exploring realistic neural  
251 models with the General Neural Simulation System., Telos, Springer,  
252 New York, 1998.
- 253 [2] N. T. Carnevale, M. L. Hines, The NEURON book, Cambridge Univer-  
254 sity Press, 2006.

- 255 [3] D. F. M. Goodman, R. Brette, BRIAN simulator, Scholarpedia 8 (1)  
256 (2013) 10883. doi:10.4249/scholarpedia.10883.
- 257 [4] V. Jirsa, O. Sporns, M. Breakspear, G. Deco, A. R. McIntosh, Towards  
258 the virtual brain: network modeling of the intact and the damaged brain,  
259 Archives Italiennes de Biologie 148 (3) (2010) 189–205.
- 260 [5] V. K. Jirsa, H. Haken, Field theory of electromagnetic brain activity,  
261 Phys. Rev. Lett. 77 (5) (1996) 960.
- 262 [6] E. J. Doedel, A. R. Champneys, T. F. Fairgrieve, Y. A. Kuznetsov,  
263 B. Sandstede, X. Wang, AUTO 97: Continuation and bifurcation soft-  
264 ware for ordinary differential equations (with HomCont) (1998).
- 265 [7] B. Ermentrout, Simulating, analyzing, and animating dynamical sys-  
266 tems: a guide to XPPAUT for researchers and students, SIAM, 2002.
- 267 [8] A. Dhooge, W. Govaerts, Y. A. Kuznetsov, MATCONT: a MATLAB  
268 package for numerical bifurcation analysis of ODEs, ACM Trans Math  
269 Softw 29 (2) (2003) 141–164.
- 270 [9] R. Clewley, Hybrid Models and Biological Model Reduction with  
271 PyDSTool, PLOS Computational Biology 8 (8) (2012) e1002628.  
272 doi:10.1371/journal.pcbi.1002628.
- 273 [10] H. Dankowicz, F. Schilder, Recipes for Continuation, SIAM, 2013.
- 274 [11] J. L. Hindmarsh, R. M. Rose, A model of neuronal bursting using three  
275 coupled first order differential equations, Proceedings of the Royal So-  
276 ciety of London B: Biological Sciences 221 (1222) (1984) 87–102.
- 277 [12] S. Heitmann, M. Breakspear, Handbook for the Brain Dynamics Tool-  
278 box: Version 2017c, QIMR Berghofer Medical Research Institute, 2017.

279 **Required Metadata**

280 **Current executable software version**

| Nr. | (executable) Software metadata description                                                                             | Please fill in this column                                                                                                                              |
|-----|------------------------------------------------------------------------------------------------------------------------|---------------------------------------------------------------------------------------------------------------------------------------------------------|
| S1  | Current software version                                                                                               | 2017c                                                                                                                                                   |
| S2  | Permanent link to executables of this version                                                                          | <a href="https://github.com/breakspear/bdtoolkit/releases/tag/bdtoolkit-2017c">https://github.com/breakspear/bdtoolkit/releases/tag/bdtoolkit-2017c</a> |
| S3  | Legal Software License                                                                                                 | BSD 2-clause                                                                                                                                            |
| S4  | Computing platform/Operating System                                                                                    | Matlab 2014b or newer                                                                                                                                   |
| S5  | Installation requirements & dependencies                                                                               | Signal Processing Toolbox (optional). Statistics and Machine Learning Toolbox (optional).                                                               |
| S6  | If available, link to user manual - if formally published include a reference to the publication in the reference list | <a href="https://bdtoolkit.blogspot.com">https://bdtoolkit.blogspot.com</a>                                                                             |
| S7  | Support email for questions                                                                                            | stewart.heitmann@gmail.com                                                                                                                              |

Table 1: Software metadata (optional)

281 **Current code version**

| Nr. | Code metadata description                                       | Please fill in this column                                                                                                                              |
|-----|-----------------------------------------------------------------|---------------------------------------------------------------------------------------------------------------------------------------------------------|
| C1  | Current code version                                            | 2017c                                                                                                                                                   |
| C2  | Permanent link to code/repository used of this code version     | <a href="https://github.com/breakspear/bdtoolkit/releases/tag/bdtoolkit-2017c">https://github.com/breakspear/bdtoolkit/releases/tag/bdtoolkit-2017c</a> |
| C3  | Legal Code License                                              | BSD 2-clause                                                                                                                                            |
| C4  | Code versioning system used                                     | git                                                                                                                                                     |
| C5  | Software code languages, tools, and services used               | Matlab 2014b or newer                                                                                                                                   |
| C6  | Compilation requirements, operating environments & dependencies | Signal Processing Toolbox (optional). Statistics and Machine Learning Toolbox (optional).                                                               |
| C7  | If available Link to developer documentation/manual             | <a href="https://bdtoolkit.blogspot.com">https://bdtoolkit.blogspot.com</a>                                                                             |
| C8  | Support email for questions                                     | stewart.heitmann@gmail.com                                                                                                                              |

Table 2: Code metadata (mandatory)
